# Supplementary material
Source: Springer Nature journal article supplement (https://www.springermedizin.de/resource/supplementary/12876_2008_274_MOESM2_ESM.pdf/9439062)
Supplement: MOESM2 [file 9439062]

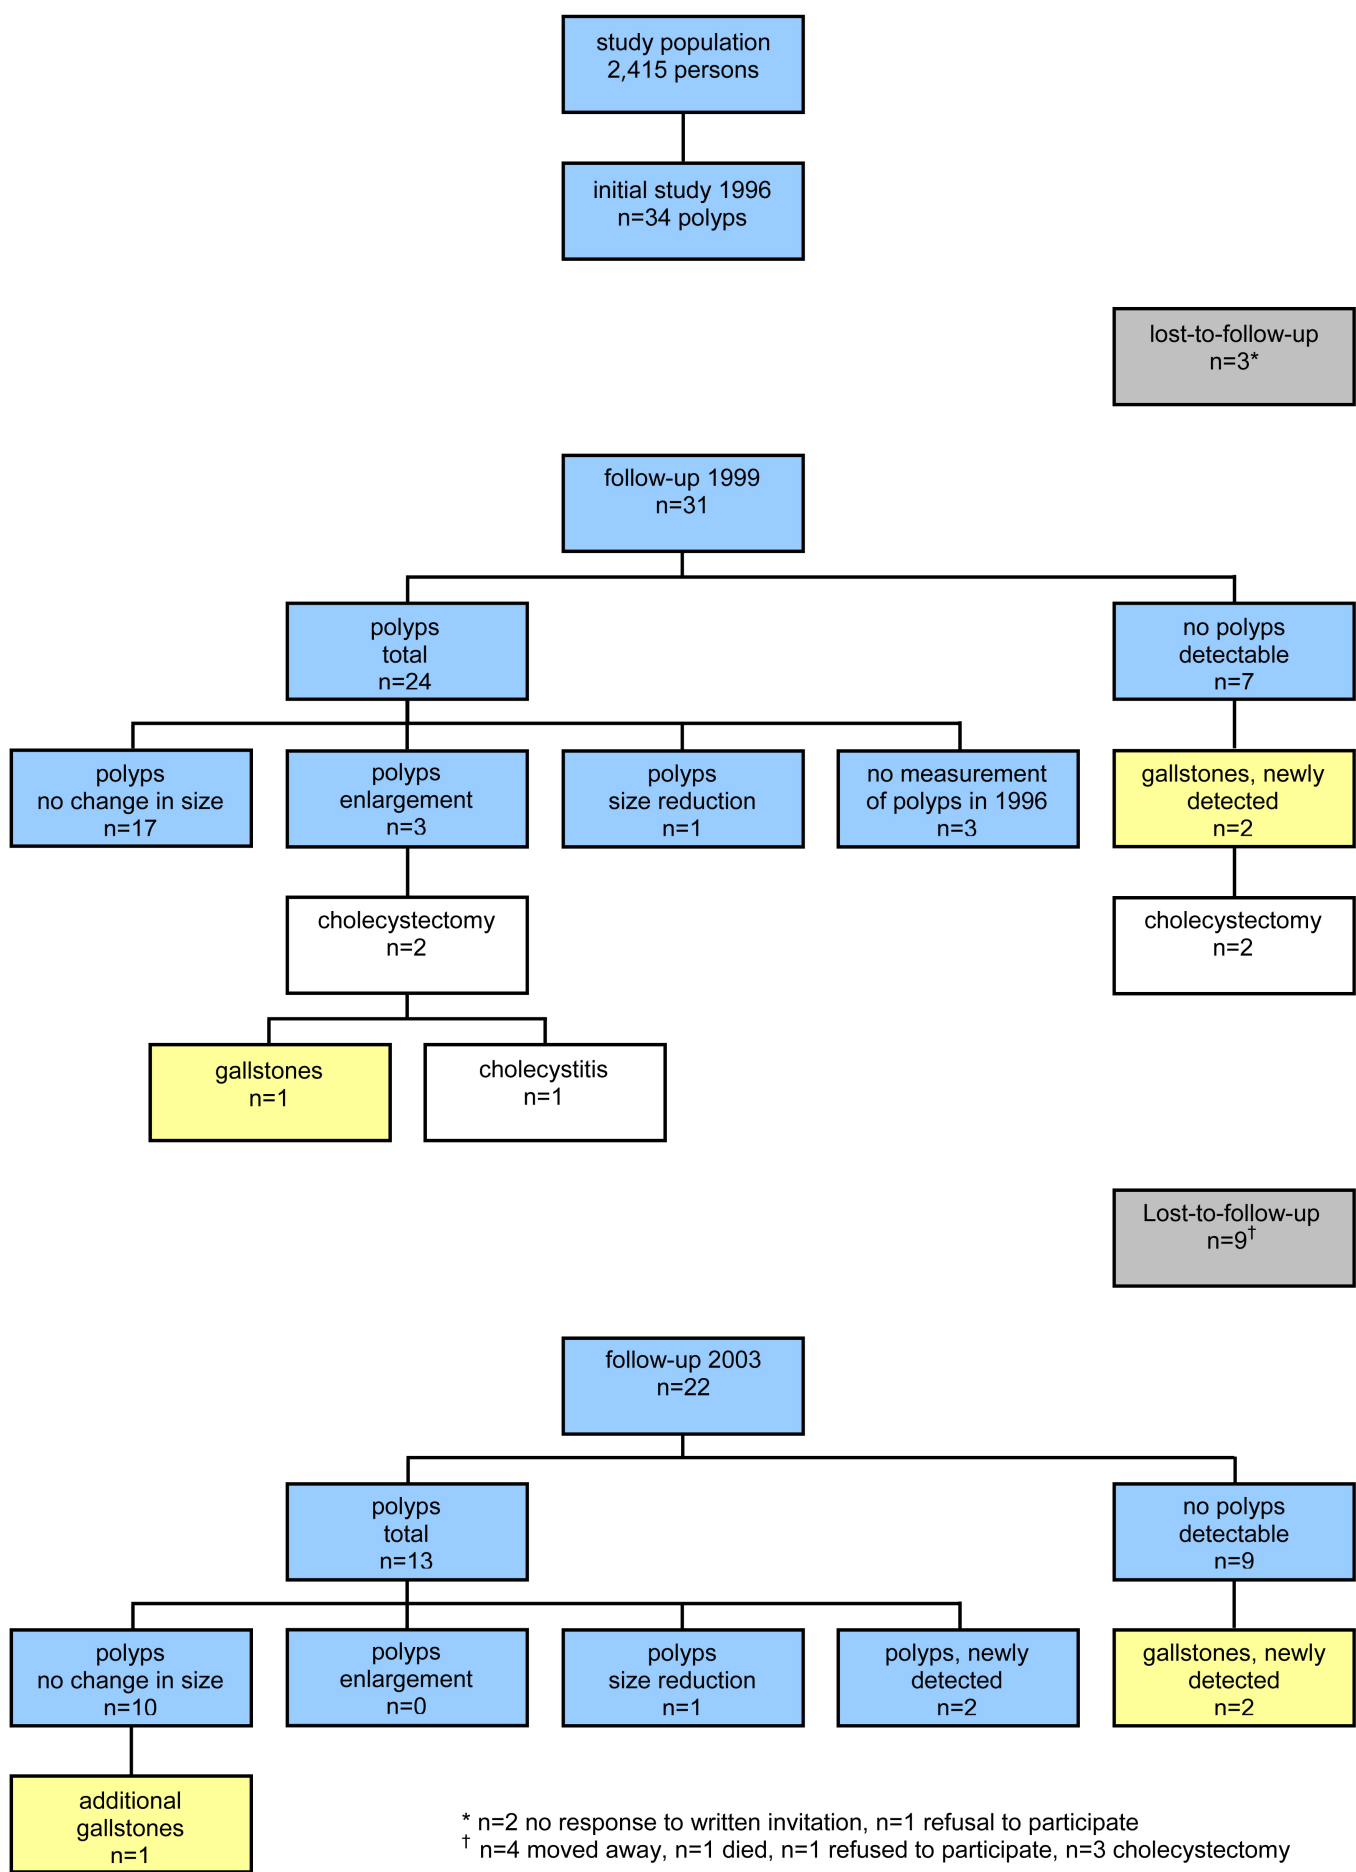

\* n=2 no response to written invitation, n=1 refusal to participate

† n=4 moved away, n=1 died, n=1 refused to participate, n=3 cholecystectomy
